# Supplementary material for: Remnant cholesterol but not LDL cholesterol is associated with 5-year bleeding following percutaneous coronary intervention
Source: PubMed Central journal article supplement — iScience. 2023 Aug 19;26(10):107666. doi: 10.1016/j.isci.2023.107666 (PMC10510087; doi:10.1016/j.isci.2023.107666), 2023-08-19
Supplement: mmc1.pdf [file mmc1.pdf]

**Supplemental information**

**Remnant cholesterol but not LDL cholesterol  
is associated with 5-year bleeding following  
percutaneous coronary intervention**

**Jiawen Li, Yulong Li, Pei Zhu, Jingjing Xu, Xiaofang Tang, Shubin Qiao, Weixian Yang, Yuejin Yang, Runlin Gao, Jinqing Yuan, and Xueyan Zhao**

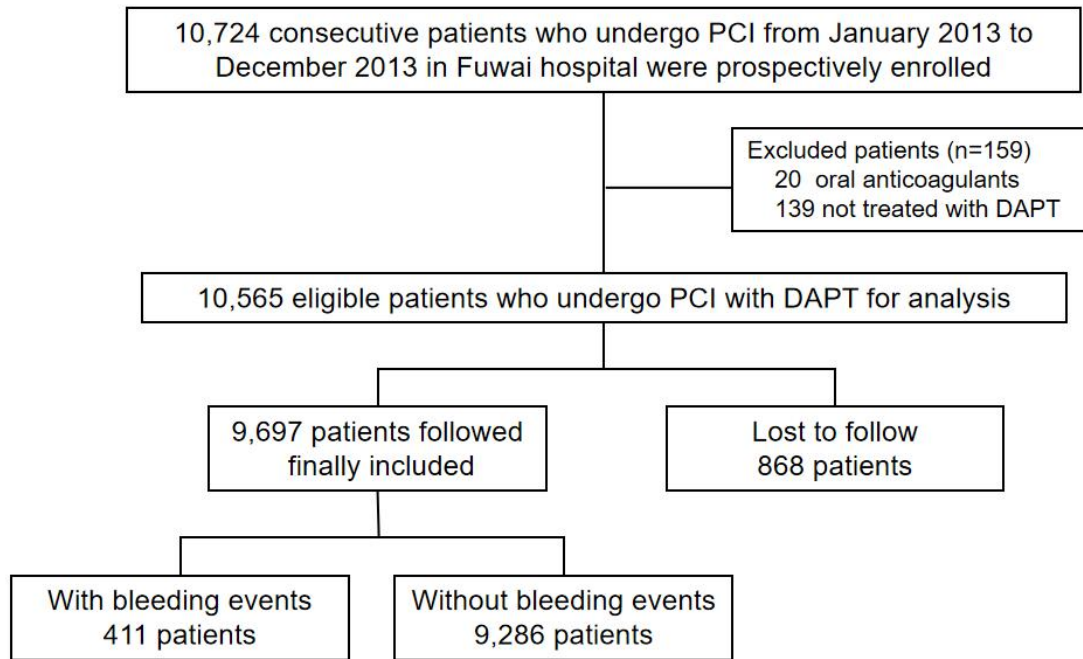

**Figure S1:** The flow chart of the study, related to Figure 1. Abbreviations: PCI: percutaneous coronary intervention; DAPT: dual antiplatelet therapy.

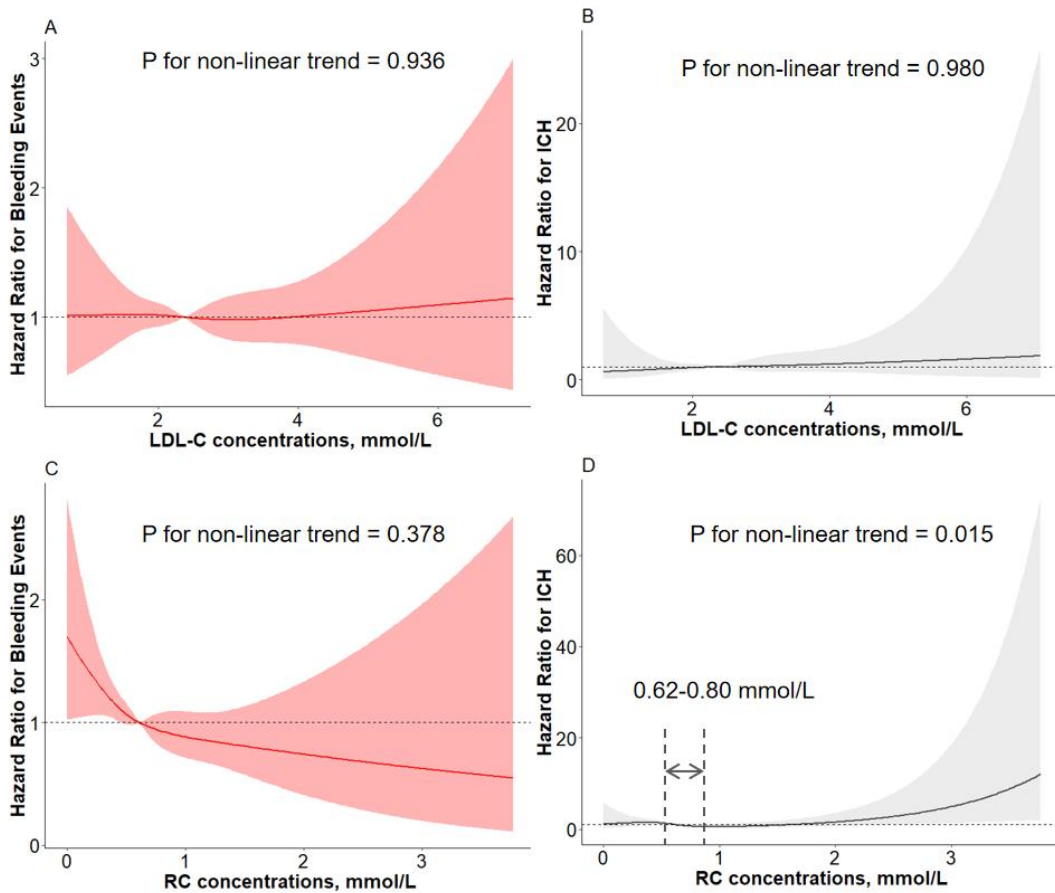

**Figure S2:** Restricted cubic splines of long-term outcomes for LDL-C and RC, related to Figure 2. We depicted the restricted cubic spline plots of bleeding events for (A) LDL-C concentrations and (C) RC concentrations as well as restricted cubic spline plots of ICH for (B) LDL-C concentrations and (D) RC concentrations. Heavy central lines represented the estimated adjusted hazard ratios, with shaded ribbons denoting 95% confidence intervals. The horizontal dotted lines represent the hazard ratio of 1.0.

The restricted cubic splines were adjusted for age, sex, body mass index, hypertension, previous bleeding, previous stroke, femoral artery approach, hemoglobin, estimated glomerular filtration rate, duration of DAPT, HDL-C, TG and high PRECISE-DAPT score, because of their statistical significances ( $P < 0.05$ ) in univariate analysis.

Abbreviations: LDL-C: low-density lipoprotein cholesterol; RC: remnant cholesterol.

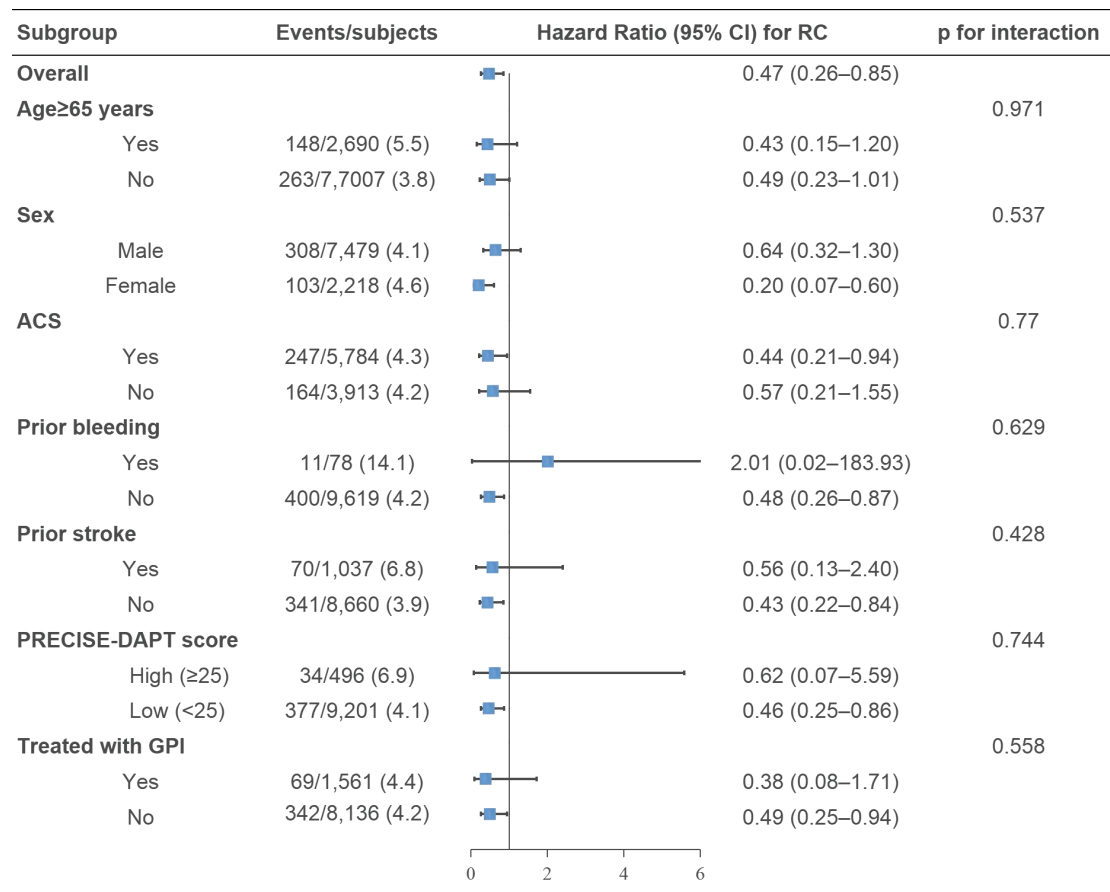

**Figure S3.** Subgroup analyses of association of RC concentrations with primary endpoint, related to Figure 2. All analyses were performed with Cox regression models with RC as a continuous variable after adjustment for age, sex, body mass index, hypertension, previous bleeding, previous stroke, femoral artery approach, hemoglobin, eGFR, duration of DAPT, HDL-C, TG and high PRECISE-DAPT score, because of their statistical significances ( $P < 0.05$ ) in univariate analysis. Abbreviations: RC: remnant cholesterol; BMI: body mass index; DAPT: dual antiplatelet therapy; PRECISE-DAPT: predicting bleeding complications in patients undergoing stent implantation and subsequent dual antiplatelet therapy; GPI: glycoprotein IIb/IIIa inhibitor.

**Table S1.** Baseline characteristics of patients with different RC concentrations, related to Table 1.

| Parameter                                          | Q1 (<0.45<br>mmol/L)<br>(n=2,486) | Q2 (0.45–0.61<br>mmol/L)<br>(n=2,449) | Q3 (0.62–0.80<br>mmol/L)<br>(n=2,419) | Q4 (>0.80<br>mmol/L)<br>(n=2,343) | <i>p</i><br>value |
|----------------------------------------------------|-----------------------------------|---------------------------------------|---------------------------------------|-----------------------------------|-------------------|
| Demographics                                       |                                   |                                       |                                       |                                   |                   |
| Age, years                                         | 60.3±9.9                          | 59.3±10.2                             | 57.7±10.3                             | 56.1±10.1                         | <0.001            |
| Male sex, n (%)                                    | 1,937 (77.9)                      | 1,925 (78.6)                          | 1,854 (76.6)                          | 1,763 (75.2)                      | 0.030             |
| BMI, kg/m <sup>2</sup>                             | 25.4±3.3                          | 25.8±3.1                              | 26.1±3.2                              | 26.5±3.1                          | <0.001            |
| Diagnosis on admission                             |                                   |                                       |                                       |                                   |                   |
| ACS, n (%)                                         | 1,410 (56.7)                      | 1,445 (59.0)                          | 1,466 (60.6)                          | 1,463 (62.4)                      | <0.001            |
| <sup>a</sup> High PRECISE-DAPT score, n (%)        | 129 (5.2)                         | 117 (4.8)                             | 146 (6.0)                             | 104 (4.4)                         | 0.071             |
| ARC-HBR criteria, n (%)                            | 226 (9.1)                         | 229 (9.4)                             | 215 (8.9)                             | 174 (7.4)                         | 0.083             |
| Medical history                                    |                                   |                                       |                                       |                                   |                   |
| Smoking, n (%)                                     | 1,344 (54.1)                      | 1,437 (58.7)                          | 1,464 (60.5)                          | 1,426 (60.9)                      | <0.001            |
| Hypertension, n (%)                                | 1,582 (63.6)                      | 1,602 (65.4)                          | 1,529 (63.2)                          | 1,536 (65.6)                      | 0.204             |
| Dyslipidaemia, n (%)                               | 1,523 (61.3)                      | 1,620 (66.1)                          | 1,648 (68.1)                          | 1,729 (73.8)                      | <0.001            |
| Diabetes mellitus, n (%)                           | 724 (29.1)                        | 762 (31.1)                            | 692 (28.6)                            | 757 (32.3)                        | 0.017             |
| COPD, n (%)                                        | 59 (2.4)                          | 48 (2.0)                              | 63 (2.6)                              | 52 (2.2)                          | 0.495             |
| Prior bleeding, n (%)                              | 23 (0.9)                          | 23 (0.9)                              | 21 (0.9)                              | 11 (0.5)                          | 0.219             |
| Prior stroke, n (%)                                | 278 (11.2)                        | 281 (11.5)                            | 254 (10.5)                            | 224 (9.6)                         | 0.143             |
| Peripheral vascular disease, n (%)                 | 79 (3.2)                          | 52 (2.1)                              | 67 (2.8)                              | 62 (2.6)                          | 0.148             |
| Prior MI, n (%)                                    | 481 (19.3)                        | 510 (20.8)                            | 491 (20.3)                            | 398 (17.0)                        | 0.004             |
| Prior PCI, n (%)                                   | 665 (26.7)                        | 652 (26.6)                            | 565 (23.4)                            | 520 (22.2)                        | <0.001            |
| Prior CABG, n (%)                                  | 96 (3.9)                          | 102 (4.2)                             | 83 (3.4)                              | 113 (4.8)                         | 0.099             |
| Family history of coronary heart<br>disease, n (%) | 566 (22.8)                        | 595 (24.3)                            | 617 (25.5)                            | 603 (25.7)                        | 0.062             |
| Laboratory variables                               |                                   |                                       |                                       |                                   |                   |

|                                    |                   |                   |                   |                   |        |
|------------------------------------|-------------------|-------------------|-------------------|-------------------|--------|
| TC, mmol/L                         | 3.76±0.91         | 3.97±0.94         | 4.28±0.95         | 4.85±1.16         | <0.001 |
| HDL-C, mmol/L                      | 1.17±0.30         | 1.05±0.26         | 0.99±0.24         | 0.92±0.22         | <0.001 |
| LDL-C, mmol/L                      | 2.29±0.81         | 2.39±0.83         | 2.59±0.86         | 2.80±1.02         | <0.001 |
| TG, mmol/L                         | 1.09±0.35         | 1.38±0.36         | 1.76±0.41         | 2.95±1.45         | <0.001 |
| Hemoglobin, g/L                    | 141.59±15.31      | 142.66±15.20      | 142.79±15.40      | 144.85±15.52      | <0.001 |
| WBC, 10 <sup>9</sup> /L            | 6.52±1.90         | 6.81±1.99         | 7.05±2.06         | 7.22±2.08         | <0.001 |
| Platelet count, 10 <sup>9</sup> /L | 196.44±50.99      | 201.44±53.09      | 209.57±55.64      | 213.36±57.22      | <0.001 |
| eGFR, ml/min                       | 91.35±13.97       | 90.78±14.77       | 91.05±15.77       | 91.81±15.09       | 0.108  |
| Serum glucose, mmol/L              | 5.37 (4.88, 6.36) | 5.47 (4.92, 6.61) | 5.64 (4.98, 6.53) | 5.67 (5.04, 7.04) | <0.001 |
| Uric acid, μmol/L                  | 325.71±77.02      | 337.49±80.38      | 348.96±85.74      | 361.80±92.38      | <0.001 |
| LVEF, %                            | 64.0 (60.0, 68.0) | 63.0 (60.0, 67.0) | 63.0 (60.0, 67.0) | 63.0 (60.0, 67.0) | <0.001 |
| Medications                        |                   |                   |                   |                   |        |
| Statin                             | 2,392 (96.2)      | 2,326 (95.0)      | 2,345 (96.9)      | 2,260 (96.5)      | 0.003  |
| Aspirin                            | 2,486 (100)       | 2,449 (100)       | 2,419 (100)       | 2,343 (100)       | -      |
| P2Y <sub>12</sub> inhibitor        |                   |                   |                   |                   | 0.222  |
| Ticagrelor                         | 7 (0.3)           | 4 (0.2)           | 6 (0.2)           | 1 (0.1)           |        |
| Clopidogrel                        | 2,479 (99.7)      | 2,445 (99.8)      | 2,413 (99.8)      | 2,342 (99.9)      |        |
| Glycoprotein IIb/IIIa inhibitor    | 387 (15.6)        | 413 (16.9)        | 399 (16.5)        | 362 (15.5)        | 0.459  |
| PPI                                | 449 (18.1)        | 473 (19.3)        | 506 (20.9)        | 482 (20.6)        | 0.050  |
| Duration of DAPT                   |                   |                   |                   |                   | 0.307  |
| ≤1 year                            | 779 (31.3)        | 759 (30.9)        | 745 (30.8)        | 702 (30.0)        |        |
| 1-2 year                           | 936 (37.7)        | 947 (38.7)        | 986 (40.8)        | 928 (39.6)        |        |
| ≥2 year                            | 771 (32.0)        | 746 (30.5)        | 688 (28.4)        | 713 (30.4)        |        |
| Femoral artery approach            | 172 (6.9)         | 189 (7.7)         | 187 (7.7)         | 189 (8.1)         | 0.480  |

**Table S2.** Baseline characteristics of patients with different LDL-C concentrations, related to Table 1.

| Parameter                                          | Q1 (<1.88<br>mmol/L)<br>(n=2,430) | Q2 (1.88–2.38<br>mmol/L)<br>(n=2,430) | Q3 (2.39–3.0<br>mmol/L)<br>(n=2,444) | Q4 (>3.0<br>mmol/L)<br>(n=2,393) | <i>p</i><br>value |
|----------------------------------------------------|-----------------------------------|---------------------------------------|--------------------------------------|----------------------------------|-------------------|
| Demographics                                       |                                   |                                       |                                      |                                  |                   |
| Age, years                                         | 58.6±10.3                         | 58.7±10.3                             | 58.3±10.1                            | 57.9±10.2                        | 0.023             |
| Male sex, n (%)                                    | 1,975 (81.3)                      | 1,935 (79.6)                          | 1,843 (75.4)                         | 1,726 (72.1)                     | <0.001            |
| BMI, kg/m <sup>2</sup>                             | 25.8±3.1                          | 25.9±3.2                              | 26.0±3.2                             | 26.1±3.2                         | 0.001             |
| Diagnosis on admission                             |                                   |                                       |                                      |                                  |                   |
| ACS, n (%)                                         | 1,394 (57.4)                      | 1,422 (58.5)                          | 1,512 (61.9)                         | 1,456 (60.8)                     | 0.005             |
| <sup>a</sup> High PRECISE-DAPT score, n (%)        | 122 (5.0)                         | 140 (5.8)                             | 127 (5.2)                            | 107 (4.5)                        | 0.239             |
| ARC-HBR criteria, n (%)                            | 250 (10.3)                        | 230 (9.5)                             | 205 (8.4)                            | 159 (6.6)                        | <0.001            |
| Medical history                                    |                                   |                                       |                                      |                                  |                   |
| Smoking, n (%)                                     | 1,466 (60.3)                      | 1,457 (60.0)                          | 1,411 (57.7)                         | 1,337 (55.9)                     | 0.005             |
| Hypertension, n (%)                                | 1,606 (66.1)                      | 1,590 (65.4)                          | 1,554 (63.6)                         | 1,499 (62.6)                     | 0.044             |
| Dyslipidaemia, n (%)                               | 1,627 (67.0)                      | 1,669 (68.7)                          | 1,629 (66.7)                         | 1,595 (66.7)                     | 0.370             |
| Diabetes mellitus, n (%)                           | 825 (34.0)                        | 746 (30.7)                            | 724 (29.6)                           | 640 (26.7)                       | <0.001            |
| COPD, n (%)                                        | 55 (2.3)                          | 65 (2.7)                              | 55 (2.3)                             | 47 (2.0)                         | 0.428             |
| Prior bleeding, n (%)                              | 15 (0.6)                          | 23 (0.9)                              | 20 (0.8)                             | 20 (0.8)                         | 0.633             |
| Prior stroke, n (%)                                | 282 (11.6)                        | 257 (10.6)                            | 275 (11.3)                           | 223 (9.3)                        | 0.053             |
| Peripheral vascular disease, n (%)                 | 83 (3.4)                          | 75 (3.1)                              | 62 (2.5)                             | 40 (1.7)                         | 0.001             |
| Prior MI, n (%)                                    | 552 (22.7)                        | 532 (21.9)                            | 422 (17.3)                           | 374 (15.6)                       | <0.001            |
| Prior PCI, n (%)                                   | 718 (29.5)                        | 635 (26.1)                            | 578 (23.6)                           | 471 (19.7)                       | <0.001            |
| Prior CABG, n (%)                                  | 111 (4.6)                         | 102 (4.2)                             | 92 (3.8)                             | 89 (3.7)                         | 0.394             |
| Family history of coronary heart disease,<br>n (%) | 541 (22.3)                        | 602 (24.8)                            | 614 (25.1)                           | 624 (26.1)                       | 0.016             |

|                                    |                   |                   |                   |                   |        |
|------------------------------------|-------------------|-------------------|-------------------|-------------------|--------|
| Laboratory variables               |                   |                   |                   |                   |        |
| TC, mmol/L                         | 3.12±0.51         | 3.79±0.41         | 4.38±0.41         | 5.58±0.86         | <0.001 |
| HDL-C, mmol/L                      | 0.98±0.29         | 1.03±0.28         | 1.04±0.25         | 1.10±0.27         | <0.001 |
| RC, mmol/L                         | 0.61±0.42         | 0.64±0.36         | 0.68±0.35         | 0.74±0.37         | <0.001 |
| TG, mmol/L                         | 1.61±1.22         | 1.71±1.03         | 1.83±0.94         | 1.98±0.95         | <0.001 |
| Hemoglobin, g/L                    | 140.98±15.11      | 142.37±15.46      | 142.98±14.99      | 145.50±15.69      | <0.001 |
| WBC, 10 <sup>9</sup> /L            | 6.66±1.87         | 6.88±1.96         | 6.97±2.11         | 7.07±2.13         | <0.001 |
| Platelet count, 10 <sup>9</sup> /L | 192.12±52.34      | 203.13±54.33      | 209.04±54.57      | 216.10±54.64      | <0.001 |
| eGFR, ml/min                       | 91.14±15.04       | 91.29±14.91       | 91.10±15.46       | 91.44±14.96       | 0.856  |
| Serum glucose, mmol/L              | 5.34 (4.86, 6.42) | 5.48 (4.92, 6.56) | 5.02 (5.71, 6.63) | 5.04 (5.61, 6.90) | <0.001 |
| Uric acid, μmol/L                  | 340.73±83.23      | 342.66±83.80      | 341.51±85.04      | 347.33±87.71      | 0.035  |
| LVEF, %                            | 64.0 (60.0, 67.0) | 63.0 (60.0, 67.0) | 63.0 (60.0, 67.0) | 63.0 (60.0, 67.0) | 0.139  |
| Medications                        |                   |                   |                   |                   |        |
| Statin                             | 2,324 (95.6)      | 2,336 (96.1)      | 2,353 (96.3)      | 2,310 (96.5)      | 0.429  |
| Aspirin                            | 2,430 (100)       | 2,430 (100)       | 2,444 (100)       | 2,393 (100)       | -      |
| P2Y <sub>12</sub> inhibitor        |                   |                   |                   |                   | 0.774  |
| Ticagrelor                         | 5 (0.2)           | 6 (0.2)           | 3 (0.1)           | 4 (0.2)           |        |
| Clopidogrel                        | 2,425 (99.8)      | 2,425 (99.8)      | 2,441 (99.9)      | 2,389 (99.8)      |        |
| Glycoprotein IIb/IIIa inhibitor    | 364 (15.0)        | 383 (15.8)        | 406 (16.6)        | 408 (17.0)        | 0.209  |
| PPI                                | 481 (19.8)        | 490 (20.2)        | 470 (19.2)        | 469 (19.6)        | 0.872  |
| Duration of DAPT                   |                   |                   |                   |                   | 0.549  |
| ≤1 year                            | 718 (29.5)        | 761 (31.3)        | 776 (31.8)        | 727 (30.4)        |        |
| 1-2 year                           | 963 (39.6)        | 927 (38.1)        | 946 (38.7)        | 961 (40.2)        |        |
| ≥2 year                            | 749 (30.8)        | 742 (30.5)        | 722 (29.5)        | 705 (29.5)        |        |
| Femoral artery approach            | 228 (9.4)         | 184 (7.6)         | 172 (7.0)         | 153 (6.4)         | 0.001  |



**Table S3.** Univariate Cox regression of lipid profile and clinical variables with bleeding events and ICH, related to Table 1.

| Parameter                    | Bleeding events  |                  | ICH              |                  |       |
|------------------------------|------------------|------------------|------------------|------------------|-------|
|                              | HR (95% CI)      | P value          | HR (95% CI)      | P value          |       |
| Lipid profile                |                  |                  |                  |                  |       |
| LDL-C (continuous variable)  | 0.97 (0.87–1.08) | 0.545            | 1.12 (0.82–1.54) | 0.475            |       |
| LDL-C (categorical variable) |                  |                  |                  |                  |       |
| Q1 (<1.88 mmol/L)            | 1[Reference]     | NA               | 1[Reference]     | NA               |       |
| Q2 (1.88–2.38 mmol/L)        | 0.90 (0.69–1.18) | 0.454            | 1.34 (0.56–3.17) | 0.512            |       |
| Q3 (2.39–3.0mmol/L)          | 0.78 (0.59–1.02) | 0.073            | 0.89 (0.34–2.30) | 0.806            |       |
| Q4 (>3.0 mmol/L)             | 0.93 (0.71–1.21) | 0.591            | 1.46 (0.63–3.42) | 0.380            |       |
| RC (continuous variable)     | 0.60 (0.44–0.82) | 0.001            | 0.81 (0.34–1.97) | 0.646            |       |
| RC (categorical variable)    |                  |                  |                  |                  |       |
| Q1 (<0.45 mmol/L)            | 1[Reference]     | NA               | 1[Reference]     | NA               |       |
| Q2 (0.45–0.61 mmol/L)        | 0.78 (0.60–1.01) | 0.055            | 0.95 (0.47–1.92) | 0.882            |       |
| Q3 (0.62–0.80 mmol/L)        | 0.74 (0.57–0.96) | 0.025            | 0.19 (0.06–0.66) | 0.009            |       |
| Q4 (>0.80 mmol/L)            | 0.61 (0.46–0.81) | 0.001            | 0.53 (0.23–1.23) | 0.137            |       |
| HDL-C                        | 1.55 (1.11–2.16) | 0.010            | 3.53 (1.44–8.62) | 0.006            |       |
| TC                           | 0.95 (0.87–1.05) | 0.311            | 1.16 (0.90–1.51) | 0.258            |       |
| TG                           | 0.88 (0.79–0.98) | 0.025            | 0.93 (0.67–1.28) | 0.646            |       |
| Clinical variables           |                  |                  |                  |                  |       |
| Age                          | 1.03 (1.02–1.04) | <.001            | 1.05 (1.02–1.08) | 0.003            |       |
| Man                          | 0.88 (0.70–1.09) | 0.241            | 0.74 (0.38–1.44) | 0.368            |       |
| BMI                          | 0.98 (0.95–1.01) | 0.118            | 0.89 (0.81–0.98) | 0.022            |       |
| ACS                          | 1.02 (0.84–1.25) | 0.811            | 1.00 (0.54–1.86) | 0.994            |       |
| High score                   | PRECISE-DAPT     | 1.79 (1.26–2.55) | 0.001            | 2.65 (1.04–6.75) | 0.041 |
| ARC-HBR criteria             | 1.66 (1.25–2.21) | 0.001            | 1.81 (0.76–4.29) | 0.180            |       |
| Smoking                      | 1.17 (0.96–1.43) | 0.116            | 0.59 (0.32–1.07) | 0.084            |       |
| Hypertension                 | 1.31 (1.06–1.61) | 0.013            | 1.78 (0.87–3.61) | 0.113            |       |
| Dyslipidaemia                | 1.09 (0.88–1.34) | 0.422            | 0.97 (0.51–1.85) | 0.931            |       |
| Diabetes mellitus            | 0.98 (0.79–1.21) | 0.813            | 0.82 (0.41–1.63) | 0.573            |       |
| COPD                         | 0.64 (0.29–1.43) | 0.276            | –                | –                |       |

|                                          |                   |        |                    |        |
|------------------------------------------|-------------------|--------|--------------------|--------|
| Prior bleeding                           | 3.62 (1.99–6.59)  | <0.001 | 9.75 (3.01–31.55)  | <0.001 |
| Prior stroke                             | 1.77 (1.37–2.28)  | <0.001 | 2.00 (0.92–4.31)   | 0.079  |
| Peripheral vascular disease              | 1.30 (0.76–2.21)  | 0.336  | 1.83 (0.44–7.59)   | 0.403  |
| Prior MI                                 | 0.90 (0.70–1.16)  | 0.421  | 0.70 (0.29–1.65)   | 0.410  |
| Prior PCI                                | 0.98 (0.79–1.23)  | 0.886  | 0.96 (0.47–1.95)   | 0.905  |
| Prior CABG                               | 1.29 (0.83–2.00)  | 0.255  | 0.58 (0.08–4.24)   | 0.594  |
| Family history of coronary heart disease | 0.95 (0.76–1.20)  | 0.680  | 0.95 (0.47–0.90)   | 0.895  |
| WBC                                      | 0.96 (0.91–1.01)  | 0.079  | 0.86 (0.71–1.03)   | 0.090  |
| Hemoglobin                               | 0.99 (0.99–1.00)  | 0.007  | 0.99 (0.97–1.01)   | 0.437  |
| Platelet count                           | 1.00 (1.00–1.00)  | 0.159  | 1.00 (0.99–1.00)   | 0.291  |
| eGFR                                     | 0.99 (0.98–0.99)  | <0.001 | 0.98 (0.97–1.00)   | 0.061  |
| Serum glucose                            | 0.97 (0.92–1.02)  | 0.219  | 0.98 (0.84–1.14)   | 0.772  |
| Uric acid                                | 1.00 (1.00–1.00)  | 0.892  | 1.00 (1.00–1.01)   | 0.441  |
| LVEF                                     | 0.99 (0.98–1.01)  | 0.306  | 1.01 (0.97–1.06)   | 0.574  |
| Statin                                   | 1.14 (0.67–1.95)  | 0.627  | 0.52 (0.16–1.68)   | 0.274  |
| Ticagrelor                               | 2.65 (0.66–10.62) | 0.170  | 12.94 (1.78–94.08) | 0.011  |
| Glycoprotein IIb/IIIa inhibitor          | 1.05 (0.81–1.36)  | 0.702  | 0.55 (0.20–1.53)   | 0.251  |
| PPI                                      | 1.02 (0.80–1.30)  | 0.871  | 0.82 (0.36–1.84)   | 0.624  |
| Duration of DAPT                         |                   |        |                    |        |
| ≤1 year                                  | 1[Reference]      | NA     | 1[Reference]       | NA     |
| 1-2 year                                 | 0.75 (0.60–0.94)  | 0.014  | 0.44 (0.21–0.88)   | 0.021  |
| ≥2 year                                  | 0.83 (0.65–1.06)  | 0.130  | 0.43 (0.20–0.93)   | 0.032  |
| Femoral artery approach                  | 1.45 (1.06–1.99)  | 0.021  | 0.30 (0.41–2.18)   | 0.234  |

**Table S4.** Risk of bleeding events across LDL-C concentrations according to clinical cut-off points, related to Table 3.

| Clinical points of LDL-C, mmol/L | cut-off<br>Events/subjects | Bleeding events           |                | ICH                       |                 |
|----------------------------------|----------------------------|---------------------------|----------------|---------------------------|-----------------|
|                                  |                            | HR (95% CI)               | <i>P</i> value | HR (95% CI)               | <i>P</i> value  |
| Model 1 <sup>a</sup>             |                            |                           |                |                           |                 |
| <1.0                             | 4/107 (3.7)                | 0.95<br>(0.35–2.58)       | 0.917          | NA <sup>b</sup>           | NA <sup>b</sup> |
| 1.0–1.79                         | 96/1,952 (4.9)             | 1.23<br>(0.92–1.63)       | 0.164          | 0.67<br>(0.24–1.86)       | 0.444           |
| 1.8–2.59                         | 156/3,859 (4.0)            | 1.01<br>(0.78–1.31)       | 0.934          | 1.05<br>(0.48–2.27)       | 0.910           |
| 2.6–3.39                         | 92/2,310 (4.0)             | 1[Reference] <sup>c</sup> | NA             | 1[Reference] <sup>c</sup> | NA              |
| 3.4–4.19                         | 41/1,012 (4.1)             | 1.03<br>(0.71–1.49)       | 0.884          | 1.16<br>(0.40–3.40)       | 0.785           |
| ≥4.2                             | 22/457 (4.8)               | 1.27<br>(0.80–2.03)       | 0.314          | 1.68<br>(0.46–6.14)       | 0.430           |
| Model 2 <sup>d</sup>             |                            |                           |                |                           |                 |
| <1.0                             | 4/107 (3.7)                | 0.92<br>(0.34–2.50)       | 0.862          | NA <sup>b</sup>           | NA <sup>b</sup> |
| 1.0–1.79                         | 96/1,952 (4.9)             | 1.19<br>(0.89–1.60)       | 0.236          | 0.72<br>(0.26–2.00)       | 0.524           |
| 1.8–2.59                         | 156/3,859 (4.0)            | 0.99<br>(0.76–1.28)       | 0.919          | 1.04<br>(0.48–2.27)       | 0.920           |
| 2.6–3.39                         | 92/2,310 (4.0)             | 1[Reference] <sup>c</sup> | NA             | 1[Reference] <sup>c</sup> | NA              |
| 3.4–4.19                         | 41/1,012 (4.1)             | 1.03<br>(0.71–1.49)       | 0.872          | 1.09<br>(0.37–3.21)       | 0.873           |
| ≥4.2                             | 22/457 (4.8)               | 1.27<br>(0.79–2.02)       | 0.325          | 1.53<br>(0.41–5.64)       | 0.525           |
| Model 3 <sup>e</sup>             |                            |                           |                |                           |                 |
| <1.0                             | 4/107 (3.7)                | 0.92<br>(0.34–2.51)       | 0.871          | NA <sup>b</sup>           | NA <sup>b</sup> |
| 1.0–1.79                         | 96/1,952 (4.9)             | 1.19<br>(0.89–1.59)       | 0.241          | 0.72<br>(0.26–2.00)       | 0.524           |
| 1.8–2.59                         | 156/3,859 (4.0)            | 0.99<br>(0.76–1.28)       | 0.924          | 1.05<br>(0.48–2.28)       | 0.911           |
| 2.6–3.39                         | 92/2,310 (4.0)             | 1[Reference] <sup>c</sup> | NA             | 1[Reference] <sup>c</sup> | NA              |
| 3.4–4.19                         | 41/1,012 (4.1)             | 1.03<br>(0.71–1.49)       | 0.870          | 1.10<br>(0.37–3.22)       | 0.869           |
| ≥4.2                             | 22/457 (4.8)               | 1.27<br>(0.79–2.03)       | 0.322          | 1.53<br>(0.41–5.64)       | 0.526           |
| Model 4 <sup>f</sup>             |                            |                           |                |                           |                 |
| <1.0                             | 4/107 (3.7)                | 0.91<br>(0.33–2.49)       | 0.858          | NA <sup>b</sup>           | NA <sup>b</sup> |
| 1.0–1.79                         | 96/1,952 (4.9)             | 1.19<br>(0.89–1.60)       | 0.235          | 0.72<br>(0.26–2.00)       | 0.524           |

|          |                 |                           |       |                           |       |
|----------|-----------------|---------------------------|-------|---------------------------|-------|
| 1.8–2.59 | 156/3,859 (4.0) | 0.99<br>(0.76–1.28)       | 0.919 | 1.04<br>(0.48–2.27)       | 0.917 |
| 2.6–3.39 | 92/2,310 (4.0)  | 1[Reference] <sup>c</sup> | NA    | 1[Reference] <sup>c</sup> | NA    |
| 3.4–4.19 | 41/1,012 (4.1)  | 1.03<br>(0.71–1.49)       | 0.871 | 1.09<br>(0.37–3.22)       | 0.871 |
| ≥4.2     | 22/457 (4.8)    | 1.27<br>(0.79–2.02)       | 0.325 | 1.53<br>(0.41–5.65)       | 0.525 |

<sup>a</sup> The model was adjusted for age, sex, and body mass index.

<sup>b</sup> The events happened too few to make statistical analysis.

<sup>c</sup> To assess the risk of bleeding events associated with baseline LDL-C concentrations, we calculated HRs and 95% CIs according to clinical cut-off points of LDL-C with LDL-C 2.6–3.39 mmol/L as the reference.

<sup>d</sup> The model was adjusted for Model 1 + hypertension, previous bleeding, previous stroke, femoral artery approach, hemoglobin, eGFR, duration of DAPT, HDL-C, and TG, because of their statistical significances ( $P < 0.05$ ) in univariate analysis.

<sup>e</sup> The model was adjusted for Model 2 + high PRECISE-DAPT score.

<sup>f</sup> The model was adjusted for Model 2 + ARC-HBR criteria.

**Table S5.** Sensitivity analysis, related to Table 3.

| Variables, mmol/L    | Bleeding events  |                | ICH              |                |
|----------------------|------------------|----------------|------------------|----------------|
|                      | HR (95% CI)      | <i>p</i> value | HR (95% CI)      | <i>p</i> value |
| LDL-C                |                  |                |                  |                |
| Model 1 <sup>a</sup> |                  |                |                  |                |
| Q1                   | 1[Reference]     | NA             | 1[Reference]     | NA             |
| Q2                   | 0.93 (0.71–1.22) | 0.597          | 0.57 (0.23–1.37) | 0.209          |
| Q3                   | 0.81 (0.61–1.07) | 0.133          | 0.87 (0.39–1.91) | 0.723          |
| Q4                   | 0.98 (0.75–1.28) | 0.873          | 0.59 (0.25–1.43) | 0.244          |
| Model 2 <sup>b</sup> |                  |                |                  |                |
| Q1                   | 1[Reference]     | NA             | 1[Reference]     | NA             |
| Q2                   | 0.94 (0.72–1.24) | 0.677          | 0.65 (0.26–1.62) | 0.356          |
| Q3                   | 0.82 (0.62–1.09) | 0.175          | 0.95 (0.43–2.10) | 0.891          |
| Q4                   | 1.02 (0.77–1.35) | 0.882          | 0.64 (0.26–1.55) | 0.322          |
| Model 3 <sup>c</sup> |                  |                |                  |                |
| Q1                   | 1[Reference]     | NA             | 1[Reference]     | NA             |
| Q2                   | 0.95 (0.72–1.24) | 0.686          | 0.66 (0.27–1.62) | 0.361          |
| Q3                   | 0.82 (0.62–1.09) | 0.178          | 0.95 (0.43–2.11) | 0.903          |
| Q4                   | 1.02 (0.77–1.35) | 0.880          | 0.64 (0.26–1.56) | 0.326          |
| Model 4 <sup>d</sup> |                  |                |                  |                |
| Q1                   | 1[Reference]     | NA             | 1[Reference]     | NA             |
| Q2                   | 0.94 (0.72–1.24) | 0.678          | 0.65 (0.26–1.62) | 0.358          |
| Q3                   | 0.82 (0.62–1.09) | 0.175          | 0.95 (0.43–2.10) | 0.890          |
| Q4                   | 1.02 (0.77–1.35) | 0.880          | 0.64 (0.26–1.55) | 0.322          |
| RC                   |                  |                |                  |                |
| Model 1 <sup>a</sup> |                  |                |                  |                |
| Q1                   | 1[Reference]     | NA             | 1[Reference]     | NA             |
| Q2                   | 0.81 (0.62–1.05) | 0.111          | 1.08 (0.52–2.20) | 0.843          |
| Q3                   | 0.80 (0.62–1.05) | 0.108          | 0.24 (0.07–0.82) | 0.022          |
| Q4                   | 0.68 (0.51–0.91) | 0.008          | 0.69 (0.29–1.67) | 0.413          |
| Model 2 <sup>b</sup> |                  |                |                  |                |
| Q1                   | 1[Reference]     | NA             | 1[Reference]     | NA             |
| Q2                   | 0.81 (0.62–1.06) | 0.121          | 1.15 (0.55–2.41) | 0.711          |
| Q3                   | 0.80 (0.60–1.06) | 0.122          | 0.24 (0.07–0.86) | 0.029          |
| Q4                   | 0.66 (0.45–0.98) | 0.040          | 0.56 (0.18–1.76) | 0.319          |
| Model 3 <sup>c</sup> |                  |                |                  |                |
| Q1                   | 1[Reference]     | NA             | 1[Reference]     | NA             |
| Q2                   | 0.81 (0.62–1.06) | 0.119          | 1.15 (0.55–2.41) | 0.711          |
| Q3                   | 0.80 (0.60–1.07) | 0.125          | 0.24 (0.07–0.87) | 0.029          |
| Q4                   | 0.66 (0.45–0.98) | 0.040          | 0.56 (0.18–1.77) | 0.323          |

Model 4<sup>d</sup>

|    |                  |       |                  |       |
|----|------------------|-------|------------------|-------|
| Q1 | 1[Reference]     | NA    | 1[Reference]     | NA    |
| Q2 | 0.81 (0.62–1.06) | 0.119 | 1.15 (0.55–2.41) | 0.710 |
| Q3 | 0.80 (0.60–1.06) | 0.120 | 0.24 (0.07–0.86) | 0.029 |
| Q4 | 0.66 (0.45–0.98) | 0.038 | 0.56 (0.18–1.76) | 0.320 |

Abbreviations: RC: remnant cholesterol; LDL-C: low-density lipoprotein cholesterol; ICH: intracranial haemorrhage; HR: hazard ratio; CI: confidence interval; NA, not applicable.

The Q1, Q2, Q3, and Q4 of LDL-C were <1.88, 1.88–2.38, 2.39–3.0 and >3.0 mmol/L, respectively. The Q1, Q2, Q3, and Q4 of RC were <0.45, 0.45–0.61, 0.62–0.80 and >0.80 mmol/L, respectively.

<sup>a</sup> Model 1 was adjusted for age, sex, and body mass index.

<sup>b</sup> Model 2 was adjusted for Model 1 + hypertension, previous bleeding, previous stroke, femoral artery approach, hemoglobin, eGFR, duration of DAPT, HDL-C, and TG, because of their statistical significances ( $P < 0.05$ ) in univariate analysis.

<sup>c</sup> Model 3 was adjusted for Model 2 + high PRECISE-DAPT score.

<sup>d</sup> Model 4 was adjusted for Model 2 + ARC-HBR criteria.
